# Supplementary material for: Circulating AR copy number and outcome to enzalutamide in docetaxel-treated metastatic castration-resistant prostate cancer
Source: PubMed Central journal article supplement (PMC5122353; doi:10.18632/oncotarget.9341), 2016-05-13
Supplement: oncotarget-07-37839-s001.pdf [file oncotarget-07-37839-s001.pdf]

# Circulating AR copy number and outcome to enzalutamide in docetaxel-treated metastatic castration-resistant prostate cancer

## Supplementary Materials

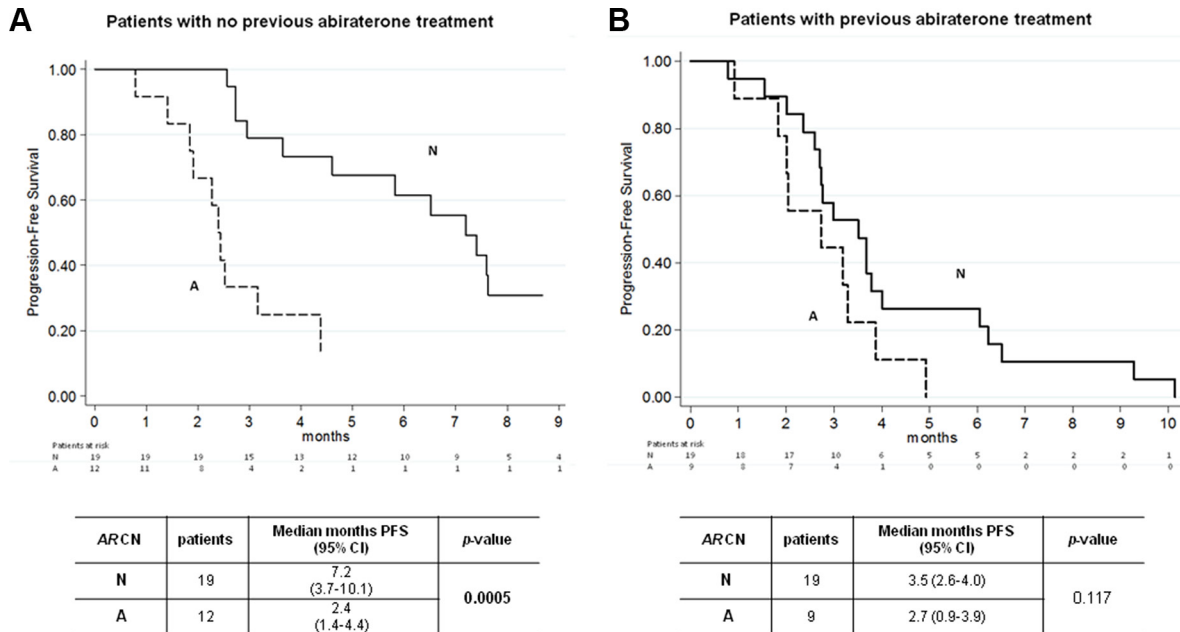

Supplementary Figure S1: Progression free-survival curves made for AR CN gain vs. non-gain in patients without abiraterone and AR CN gain vs. non-gain with previous abiraterone.

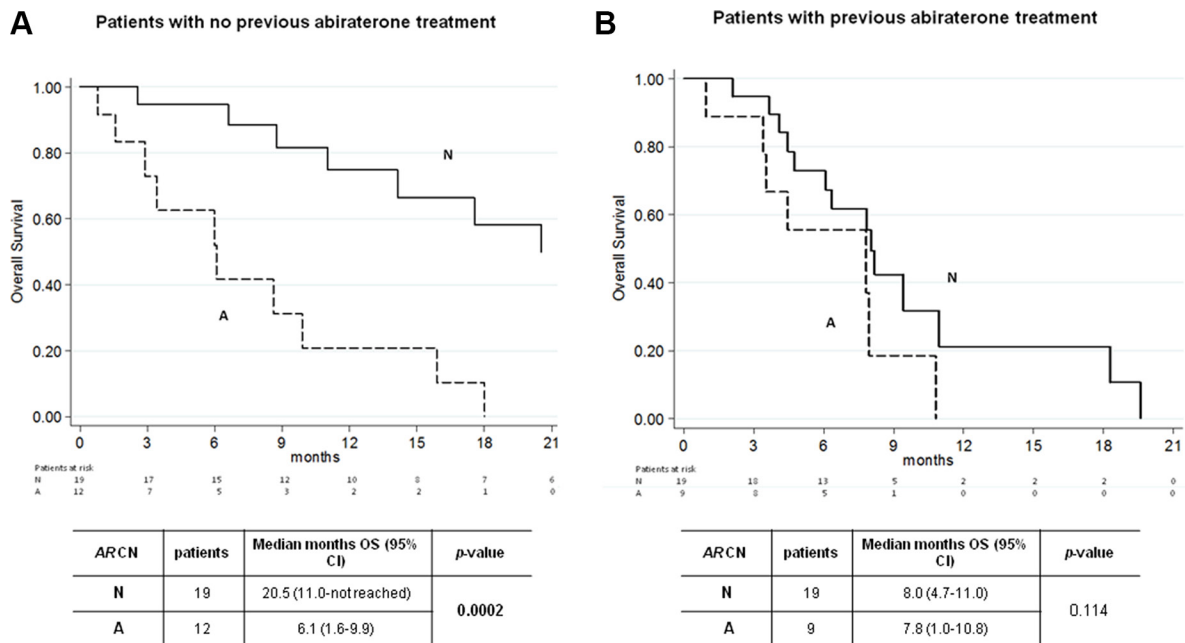

Supplementary Figure S2: Overall survival curves made for AR CN gain vs. non-gain in patients without abiraterone and AR CN gain vs. non-gain with previous abiraterone.

**Supplementary Table S1: Sensitivity and specificity of *AR* copy number variations with respect to PFS and OS**

|                                  | <b>Sensitivity (95% CI)</b> | <b>Specificity (95% CI)</b> | <b>Overall Accuracy (95% CI)</b> |
|----------------------------------|-----------------------------|-----------------------------|----------------------------------|
| <b>Progression-free survival</b> |                             |                             |                                  |
| <i>AR</i> CN                     | 55.2 (41.5–68.1)            | 85.7 (73.4–93.1)            | 70.2 (58.2–82.1)                 |
| <b>Overall survival</b>          |                             |                             |                                  |
| <i>AR</i> CN                     | 50.0 (35.1–64.9)            | 80.0 (65.1–89.8)            | 63.0 (49.1–77.0)                 |

*AR*, androgen receptor; CN, copy number.
